# Supplementary material for: The Role of Amino Acids in the Formation of Aroma-Active Compounds during Shrimp Hot Air Drying by GC-MS and GC-IMS
Source: MDPI journal article supplement (doi:10.3390/foods11203264), 2022-10-19
Supplement: s1 [file s1]

**Table S1.** Volatile compounds identified in shrimp of different moisture contents.

| Compound (ng/g)                                   | 5%S          | 15%S         | 30%S       | 45%S       | RS        |
|---------------------------------------------------|--------------|--------------|------------|------------|-----------|
| <b>Pyrazines (20)</b>                             |              |              |            |            |           |
| 2,5-Dimethylpyrazine                              | 175.41±8.55  | 33.51±2.50   | ND         | ND         | ND        |
| Trimethyl pyrazine                                | 158.27±14.47 | 22.87±5.72   | ND         | ND         | ND        |
| 2-Ethyl-3,6-dimethylpyrazine                      | 87.12±1.79   | 28.26±1.49   | ND         | ND         | ND        |
| 2-Ethyl-5-methylpyrazine                          | 23.32±0.48   | 7.59±0.50    | ND         | ND         | ND        |
| 2,5-Dimethyl-3-(3-methylbutyl)-pyrazine           | 20.23±1.47   | 3.04±0.17    | ND         | ND         | ND        |
| 2-Ethenyl-6-methylpyrazine                        | 20.06±1.82   | 8.55±0.56    | ND         | ND         | ND        |
| 2-Methyl-6-(1-propenyl)-pyrazine                  | 17.6±1.32    | 11.01±0.52   | ND         | ND         | ND        |
| Methyl pyrazine                                   | 13.72±1.59   | 6.16±0.81    | ND         | ND         | ND        |
| 2,6-Dimethylpyrazine                              | 12.72±1.19   | 5.75±0.24    | ND         | ND         | ND        |
| 2,3,5-Trimethyl-6-ethylpyrazine                   | 6.29±0.54    | 1.30±0.00    | ND         | ND         | ND        |
| 3,5-Diethyl-2-methylpyrazine                      | 5.87±0.27    | 1.80±0.45    | ND         | ND         | ND        |
| 2,3-Dimethylpyrazine                              | 5.76±0.28    | 2.69±0.31    | ND         | ND         | ND        |
| 2-Ethyl-6-methylpyrazine                          | 5.42±0.47    | ND           | ND         | ND         | ND        |
| Tetramethyl pyrazine                              | 5.32±0.93    | 1.60±0.27    | ND         | ND         | ND        |
| 2-Acetyl-3-methyl-pyrazine                        | 4.32±0.58    | 2.29±0.16    | ND         | ND         | ND        |
| 2-Isoamyl-6-methylpyrazine                        | 2.48±0.35    | ND           | ND         | ND         | ND        |
| 2,5-Dimethyl-3-(2-methylpropyl)-pyrazine          | 2.22±0.08    | 0.33±0.01    | ND         | ND         | ND        |
| 2,3-Dimethyl-5-n-propylpyrazine                   | 1.01±0.20    | ND           | ND         | ND         | ND        |
| 2,5-Dimethyl-3-propylpyrazine                     | 0.93±0.10    | ND           | ND         | ND         | ND        |
| 2,6-Diethylpyrazine                               | 0.77±0.02    | ND           | ND         | ND         | ND        |
| Subtotal                                          | 568.84±36.5  | 136.75±13.71 | 0±0        | 0±0        | 0±0       |
| <b>Aldehydes (7)</b>                              |              |              |            |            |           |
| 2-Methylbutanal                                   | 27.26±3.23   | 21.23±1.32   | 4.01±2.01  | ND         | ND        |
| 3-Methylbutana                                    | 34.92±5.24   | 26.10±0.00   | ND         | ND         | ND        |
| Benzaldehyde                                      | 29.10±0.66   | 19.07±0.90   | 2.71±0.10  | 1.99±0.06  | 0.14±0.00 |
| Octanal                                           | 1.20±0.27    | 0.71±0.05    | ND         | ND         | ND        |
| Hexanal                                           | 1.79±0.43    | 1.72±0.88    | 0.31±0.00  | ND         | ND        |
| Pentanal                                          | 27.2±0.94    | 20.20±0.49   | ND         | ND         | ND        |
| 2-Phenylpropenal                                  | 2.58±0.74    | 1.03±0.33    | 0.23±0.02  | ND         | ND        |
| Subtotal                                          | 124.05±11.51 | 90.06±3.97   | 7.26±2.13  | 1.99±0.06  | 0.14±0    |
| <b>Ketones (12)</b>                               |              |              |            |            |           |
| 2,3-Dihydro-3,5-dihydroxy-6-methyl-4H-pyran-4-one | 13.27±1.64   | 4.21±0.57    | ND         | ND         | ND        |
| 2,5-Dimethylfuran-3,4(2H,5H)-dione                | 0.96±0.03    | 0.23±0.00    | ND         | ND         | ND        |
| 2-Pyrrolidinone                                   | 2.71±0.19    | 1.13±0.13    | 0.54±0.13  | 0.44±0.14  | ND        |
| 2-Heptanone                                       | 5.67±1.19    | 6.06±0.88    | ND         | ND         | ND        |
| 2-Decanone                                        | 7.05±0.32    | 4.71±0.22    | ND         | ND         | ND        |
| 2-Piperidinone                                    | 4.19±0.15    | 1.60±0.41    | 0.22±0.05  | 0.28±0.00  | ND        |
| 2-Nonanone                                        | 9.76±2.1     | 13.94±0.43   | 12.45±1.06 | 8.34±1.27  | 2.38±1.09 |
| 2-Undecanone                                      | 1.60±0.00    | 1.12±0.14    | 0.45±0.00  | 0.52±0.13  | ND        |
| 2-Octanone                                        | 4.96±0.27    | 3.57±0.13    | 0.91±0.01  | 0.5±0.00   | 0.12±0.05 |
| Trans-geranyl acetone                             | 1.10±0.00    | 1.59±0.78    | 0.56±0.11  | 0.83±0.19  | 0.37±0.10 |
| 6-Methyl-hept-5-en-2-one                          | ND           | ND           | 0.64±0.16  | 0.53±0.01  | 0.47±0.18 |
| 5-Methyl-2-hexanone                               | 6.78±0.00    | ND           | 1.89±0.13  | 1.75±0.00  | 1.03±0.00 |
| Subtotal                                          | 58.05±5.89   | 38.16±3.69   | 17.66±1.65 | 13.19±1.74 | 4.37±1.32 |
| <b>Alcohols (6)</b>                               |              |              |            |            |           |
| 1-octen-3-ol                                      | 7.56±0.56    | 9.34±0.00    | 2.00±0.09  | 1.04±0.19  | 0.22±0.07 |
| Benzyl alcohol                                    | 4.18±0.37    | 0.81±0.10    | 0.28±0.01  | ND         | ND        |
| 1-Pentanol                                        | ND           | 2.62±0.42    | 3.65±0     | 2.74±0.49  | 0.57±0.00 |
| 2-Ethyl-hexanol                                   | 1.63±0.00    | ND           | 1.89±0.01  | 1.93±0.53  | 0.60±0.26 |
| 1-Octanol                                         | ND           | ND           | 1.71±1.02  | 1.77±0.03  | 1.22±0.38 |
| Tridecanol                                        | 0.52±0.06    | 0.40±0.07    | 0.32±0.09  | ND         | 0.06±0.08 |
| Subtotal                                          | 13.89±0.99   | 13.17±0.59   | 9.85±1.22  | 7.48±1.24  | 2.67±0.79 |
| <b>Acids (12)</b>                                 |              |              |            |            |           |
| Diethyl-acetic acid                               | 4.05±0.00    | 4.76±1.88    | ND         | ND         | ND        |
| 3-Methyl-butanoic acid                            | ND           | ND           | 1.7±0.42   | 1.84±0.06  | ND        |
| 3-Methyl-pentanoic acid                           | 9.08±1.69    | 5.10±0.39    | ND         | ND         | ND        |
| Benzoic acid                                      | 1.07±0.17    | 0.82±0.05    | 0.41±0.10  | ND         | ND        |

|                                   |               |              |              |              |             |
|-----------------------------------|---------------|--------------|--------------|--------------|-------------|
| Trans-2-decenoic acid             | 6.23±0.37     | 4.07±0.54    | 1.02±0.34    | 2.43±0.53    | ND          |
| (E)-3-decenoic acid,              | 5.56±0.37     | 4.78±1.28    | 1.34±0.46    | 2.44±0.80    | ND          |
| Decanoic acid                     | 3.45±0.30     | 1.55±0.57    | 0.37±0.12    | 0.75±0.12    | ND          |
| Octanoic acid                     | 1.98±0.09     | 1.17±0.20    | 0.73±0.00    | 0.9±0.19     | 0.08±0.02   |
| Acetic acid                       | ND            | 4.99±0.02    | 0.87±0.07    | 0.86±0.28    | 0.21±0.05   |
| Tetradecanoic acid                | 1.44±0.25     | 0.90±0.00    | 0.19±0.06    | 1.76±0.71    | 0.35±0.08   |
| Pentadecanoic acid                | 0.53±0.08     | ND           | 0.37±0.10    | 0.61±0.08    | 0.23±0.05   |
| Hexadecanoic acid                 | 5.87±0.19     | 2.87±0.38    | 1.00±0.09    | 5.59±0.82    | 1.59±0.51   |
| Subtotal                          | 39.26±3.51    | 31.01±5.31   | 8.00±1.76    | 17.18±3.59   | 2.46±0.71   |
| N-containing compounds (4)        |               |              |              |              |             |
| Trimethylamide                    | 206.3±15.36   | 135.1±0.67   | 78.51±0.53   | 58.01±7.37   | 10.12±4.74  |
| 1-(1H-Pyrrol-2-yl)-ethanone       | 3.58±0.26     | 0.84±0.81    | ND           | ND           | ND          |
| 1-(2-Pyridinyl)-ethanone          | 2.86±0.38     | 1.76±0.03    | ND           | ND           | ND          |
| 2-Acetyl-1-pyrroline              | 7.89±0.56     | 4.35±0.36    | 1.49±0.07    | ND           | ND          |
| Subtotal                          | 220.63±16.56  | 142.05±1.87  | 80.00±0.60   | 58.01±7.37   | 10.12±4.74  |
| Hydrocarbons (12)                 |               |              |              |              |             |
| Tridecane                         | 8.27±2.08     | 5.00±2.26    | 2.80±1.22    | 4.65±2.02    | 1.11±0.18   |
| Undecane                          | 8.95±3.46     | 2.15±0.95    | 2.16±0.86    | 1.53±0.61    | 1.87±0.42   |
| Pentadecane                       | 0.51±0.13     | 0.53±0.19    | 2.04±1.63    | 1.06±0.61    | 0.31±0.00   |
| Tetradecane                       | 1.44±0.29     | 1.28±0.44    | 0.79±0.15    | 1.09±0.31    | 0.57±0.13   |
| Heptadecane                       | 0.98±0.15     | 0.88±0.08    | ND           | 1.32±0.36    | ND          |
| Dodecane                          | 23.23±11.84   | 8.72±3.98    | 7.68±3.53    | 10.99±3.72   | 4.84±0.85   |
| Decane                            | 4.95±0.54     | 2.82±0.60    | 0.62±0.09    | 0.53±0.06    | 1.40±0.18   |
| 2,6,10,14-Tetramethyl-pentadecane | 2.53±0.00     | 1.90±0.00    | 0.77±0.39    | 0.71±0.04    | ND          |
| 2,6,10-Trimethyltridecane         | 2.01±0.57     | 1.49±0.15    | 0.73±0.22    | 0.43±0.05    | ND          |
| 3,7-Dimethyl-decane               | ND            | 1.97±0.25    | 1.79±1.23    | 1.01±0.28    | 1.76±0.28   |
| 2,6,11-Trimethyl-dodecane         | ND            | 2.22±0.16    | 1.58±0.33    | 1.59±0.41    | 1.11±0.24   |
| 5-Methyl-tetradecane              | ND            | 0.46±0.37    | 0.92±0.16    | 0.73±0.31    | 0.71±0.19   |
| Subtotal                          | 52.87±19.06   | 29.42±9.43   | 21.88±9.81   | 25.64±8.78   | 13.68±2.47  |
| Total                             | 1077.59±94.02 | 480.62±38.57 | 144.65±17.17 | 123.71±22.78 | 33.44±10.03 |

ND = not determined.

**Table S2.** Volatile compounds of dried shrimp from the addition assays.

| Compound(ng/g)                           | LysG          | HisG         | ArgG          | PheG         | LeuG         | IleG         |
|------------------------------------------|---------------|--------------|---------------|--------------|--------------|--------------|
| Pyrazines (22)                           |               |              |               |              |              |              |
| 2,3,5-trimethyl-6-ethylpyrazine          | 6.91±0.58     | 1.27±0.82    | 8.11±1.24     | 2.28±0.69    | 1.53±0.02    | 2.34±0.32    |
| Tetramethyl pyrazine,                    | 14.00±1.16    | 4.85±2.90    | 20.29±4.12    | 6.56±0.24    | 9.62±1.66    | 10.44±1.83   |
| Trimethyl pyrazine                       | 397.21±4.81   | 176.39±15.54 | 547.68±14.65  | 206.01±22.89 | 185.50±11.10 | 188.05±16.8  |
| 2,3-Dimethyl-5-n-propylpyrazine          | 0.38±0.00     | 22.06±2.00   | 0.43±0.00     | 0.37±0.00    | 1.20±0.22    | 25.12±2.12   |
| 2,3-Dimethylpyrazine                     | 30.89±6.31    | 13.72±1.00   | 32.2±5.12     | 12.59±0.06   | 16.64±4.00   | ND           |
| 2,5-Dimethyl-3-(2-methylpropyl)-pyrazine | 1.12±0.12     | 1.98±0.00    | 2.57±0.18     | 1.43±0.30    | 1.51±0.00    | 1.48±0.24    |
| 2,5-Dimethyl-3-(3-methylbutyl)-pyrazine  | 10.65±1.07    | 5.04±2.26    | 23.49±1.31    | 8.37±0.53    | 11.02±0.73   | 3.80±0.49    |
| 3,5-Diethyl-2-methylpyrazine             | 13.19±0.91    | 2.2±1.01     | 11.59±2.13    | 8.37±1.86    | 3.94±0.74    | 6.19±2.11    |
| 2,5-Dimethylpyrazine                     | 237.97±8.06   | 155.71±7.00  | 312.83±5.19   | 135.37±18.28 | 144.07±12.59 | 128.57±19.22 |
| 2,6-Dimethylpyrazine                     | 45.14±3.75    | 33.8±4.75    | 63.69±2.71    | 26.97±3.63   | 34.89±3.16   | 30.33±1.10   |
| 2,6-Diethylpyrazine                      | 51.00±3.85    | 11.21±2.00   | 62.38±4.27    | 28.94±1.45   | 19.37±1.11   | 25.1±1.12    |
| 2-Methyl-5-(1-propenyl)-pyrazine         | 4.34±0.00     | ND           | 0.82±0.00     | 1.55±0.18    | ND           | 0.85±0.07    |
| 2-Methyl-6-(1-propenyl)-pyrazine         | 14.31±2.23    | 23.2±0.00    | 32.19±1.4     | 12.51±7.97   | 14.59±1.55   | 18.32±2.92   |
| 2-Isoamyl-6-methylpyrazine               | 0.86±0.00     | ND           | 2.63±0.30     | ND           | 2.29±0.38    | ND           |
| 2-Ethenyl-6-methylpyrazine               | 24.80±1.59    | 23.43±2.35   | 20.71±2.39    | 13.13±2.88   | 25.31±0.80   | 20.51±1.75   |
| 2-Methylpyrazine                         | 40.95±3.48    | 37.21±0      | 31.9±1.64     | 19.02±1.14   | 27.39±3.08   | 26.39±1.88   |
| 2-Ethyl-5-methylpyrazine                 | 30.47±2.67    | 13.77±4.31   | 43.65±1.06    | 20.41±1.63   | 17.72±0.24   | 18.09±1.52   |
| 2-Ethyl-6-methylpyrazine                 | ND            | ND           | 1.07±0.00     | ND           | ND           | 7.48±0.00    |
| 2-Ethylpyrazine                          | 15.42±1.24    | 11.19±0      | 22.69±7.82    | 8.97±0.06    | 15.84±4.08   | 8.55±0.74    |
| 2-Acetyl-3-methylpyrazine                | 26.79±1.67    | 10.23±2.31   | 1.35±0.00     | 6.83±1.58    | 7.66±0.63    | 8.49±0.13    |
| 2,5-Dimethyl-3-propylpyrazine            | 1.40±0.63     | ND           | 2.62±1.06     | ND           | 0.63±0.00    | ND           |
| 2-Ethyl-3,6-dimethylpyrazin              | 126.51±13.34  | 46.37±6.69   | 151.87±20.77  | 70.98±7.93   | 48.57±4.13   | 55.51±4.87   |
| Subtotal                                 | 1094.31±57.47 | 593.63±54.94 | 1396.76±77.36 | 590.66±73.3  | 589.29±50.22 | 585.61±59.23 |
| Aldehydes (7)                            |               |              |               |              |              |              |
| 2-Methylbutanal                          | 15.44±5.09    | 27.04±9.41   | 25.11±2.00    | 13.99±1.23   | ND           | 60.76±7.55   |
| 3-Methylbutanal                          | 7.38±3.21     | 16.42±4.95   | 7.78±2.23     | 5.51±0.56    | 59.58±3.38   | ND           |

|                                                   |              |              |              |              |              |              |
|---------------------------------------------------|--------------|--------------|--------------|--------------|--------------|--------------|
| Benzaldehyde                                      | 15.48±1.07   | 21.84±7.21   | 20.27±2.16   | 52.2±3.07    | 23.24±2.03   | 27.56±1.72   |
| 2-Phenylpropenal                                  | 1.02±0.13    | 1.42±0.93    | ND           | 4.47±0.84    | 2.83±0.27    | 2.96±0.60    |
| Hexanal                                           | ND           | 6.25±1.27    | ND           | 0.58±0.10    | 7.47±9.05    | 1.22±0.34    |
| Pentanal                                          | ND           | 13.69±2.48   | 15.32±3.13   | 26.79±2.20   | ND           | ND           |
| Octanal                                           | ND           | 0.82±0.00    | ND           | 0.58±0.11    | 1.03±0.25    | 1.15±0.09    |
| Subtotal                                          | 39.32±9.50   | 87.48±26.25  | 68.48±9.52   | 104.12±8.11  | 94.15±14.98  | 93.65±10.3   |
| N-containing compounds (7)                        |              |              |              |              |              |              |
| Trimethylamine                                    | 601.35±22.66 | 308.41±29.82 | 384.74±40.54 | 231.14±23.04 | 248.6±20.08  | 258.37±14.28 |
| Dimethylamine                                     | 98.83±16.94  | 3.02±1.72    | 70.59±0.66   |              | 8.72±7.48    | 1.3±0.00     |
| Acetamide                                         | 3.97±1.53    | 2.41±0.71    | 4.79±0.23    | 3.55±0.30    | 3.28±0.49    | 2.75±0.19    |
| 1-Methyl-1H-pyrrole                               | 3.46±2.29    | 13.22±2.01   | 1.55±0.40    | ND           | ND           | ND           |
| 2-Acetyl-1-pyrroline                              | 7.45±2.92    | ND           | 9.69±1.02    | ND           | 6.19±0.23    | 8.22±0.53    |
| 2-Acetyl-pyridine                                 | 1.90±0.09    | ND           | ND           | ND           | ND           | 0.06±0.00    |
| 2-Acetylthiazole                                  | 5.08±1.54    | 4.04±1.70    | 5.65±2.15    | 5.70±0.44    | 6.99±3.46    | 5.08±1.54    |
| Subtotal                                          | 722.04±47.97 | 331.1±35.96  | 477.01±45    | 240.39±23.78 | 273.78±31.74 | 275.78±16.54 |
| Ketones (17)                                      |              |              |              |              |              |              |
| 1-Octen-3-one                                     | ND           | 1.49±0.00    | ND           | ND           | ND           | 0.15±0.05    |
| 2,3-Dihydro-3,5-dihydroxy-6-methyl-4H-pyran-4-one | 2.94±0.83    | 3.80±1.63    | 5.40±0.08    | 3.88±0.68    | 4.80±2.03    | 2.76±0.94    |
| Acetylbutyryl                                     | ND           | ND           | ND           | 1.52±0.87    | 1.09±0.00    | 3.86±4.13    |
| 2-Pyrrolidinone                                   | 3.05±1.22    | 1.35±0.65    | 5.92±0.80    | 2.40±0.20    | 1.8±0.50     | 1.77±0.21    |
| 2-Butanone                                        | 12.46±1.19   | 1.60±0.00    | ND           | ND           | ND           | ND           |
| 2-Heptanone                                       | 6.52±0.93    | 19.51±2.35   | 6.66±0.70    | 6.87±0.30    | 7.25±2.22    | 7.98±1.92    |
| 2-Piperidinone                                    | 26.98±2.86   | 2.01±0.59    | 5.98±0.57    | 3.27±0.09    | 2.36±0.72    | 1.71±0.36    |
| 2-Nonanone                                        | 15.05±6.96   | 5.33±1.46    | 5.56±3.30    | 5.60±0.14    | 3.87±0.29    | 5.09±0.30    |
| 2-Tridecanone                                     | 0.57±0.02    | ND           | 0.64±0.00    | ND           | 0.58±0.00    | ND           |
| 2-Undecanone                                      | 0.95±0.56    | ND           | 1.84±0.28    | 1.46±0.53    | 0.80±0.34    | 2.09±0.00    |
| 2-Pentadecanone                                   | 0.62±0.20    | 0.58±0.03    | 0.74±0.00    | 0.58±0.07    | 1.01±0.00    | 0.75±0.26    |
| 2-Pentanone                                       | ND           | 3.79±0.00    | ND           | ND           | 11.24±2.30   | 7.78±0.19    |
| 2-Octanone                                        | 6.15±0.98    | 4.82±2.88    | 5.21±0.73    | 3.06±0.20    | 3.20±0.62    | 3.11±0.15    |
| 3-Hexanone                                        | ND           | 5.19±0.56    | ND           | ND           | 29.34±2.34   | ND           |
| 6-Methyl-5-hepten-2-one                           | 8.58±1.00    | 20.91±2.35   | ND           | 12.07±0.50   | 7.17±0.65    | 19.83±0.99   |
| Acetophenone                                      | ND           | ND           | ND           | 9.33±1.09    | ND           | ND           |
| Trans-geranylacetone                              | 9.52±2.78    | 4.21±1.96    | 3.25±0.79    | 3.37±0.57    | 7.13±1.63    | 11.92±0.94   |
| Subtotal                                          | 93.39±19.53  | 73.1±14.46   | 41.2±7.25    | 53.41±5.24   | 81.64±13.64  | 68.65±10.39  |
| Alcohols (7)                                      |              |              |              |              |              |              |
| 1-Tridecanol                                      | 2.71±1.46    | 2.12±0.19    | 1.48±0.00    | 1.41±0.00    | 1.68±0.00    | 2.71±1.46    |
| 1-Penten-3-ol                                     | 4.31±0.53    | 11.82±1.11   | 2.90±0.37    | 4.96±1.53    | 7.66±2.22    | 4.79±0.00    |
| Benzyl alcohol                                    | 2.60±0.16    | 1.45±0.31    | 3.4±0.20     | 6.27±0.40    | 1.81±0.07    | 1.62±0.12    |
| 1-Hexadecanol                                     | 1.31±0.00    | ND           | 0.65±0.00    | 0.91±0.06    | 2.1±0.00     | ND           |
| 1-Octanol                                         | 0.40±0.00    | ND           | ND           | ND           | 0.33±0.00    | ND           |
| 2-Ethylhexanol                                    | ND           | ND           | ND           | 1.67±0.37    | 0.69±0.00    | ND           |
| 1-Dodecanol                                       | 0.66±0.00    | ND           | ND           | ND           | 1.78±0.00    | 2.32±0.00    |
| Subtotal                                          | 11.99±2.15   | 15.39±1.61   | 8.43±0.37    | 15.22±2.36   | 16.05±2.29   | 11.44±1.58   |
| Acids (11)                                        |              |              |              |              |              |              |
| 2-Methylbutanoic acid                             | ND           | ND           | ND           | ND           | ND           | 19.39±3.98   |
| 2-Diethylacetic acid                              | ND           | 3.29±2.41    | 4.70±0.93    | 10.76±1.47   | 5.09±1.42    | 7.75±1.31    |
| 2-Ethylhexanoic acid                              | 0.79±0.34    | ND           | ND           | 0.46±0.00    | ND           | ND           |
| 3-Methylbutanoic acid                             | ND           | ND           | ND           | ND           | 16.39±2.55   | ND           |
| 3-Methylpentanoic acid                            | 10.75±3.83   | 6.21±3.92    | 8.96±0.68    | 9.66±0.35    | ND           | ND           |
| Benzoic acid                                      | 3.64±2.12    | 4.35±0.64    | 1.73±0.23    | 5.28±0.61    | 1.94±0.11    | 1.96±0.02    |
| Decanoic acid                                     | 4.01±1.35    | 1.88±0.64    | 1.90±0.26    | ND           | 2.78±0.00    | 2.14±0.00    |
| Nonanoic acid                                     | ND           | ND           | ND           | ND           | 2.78±0.26    | 2.47±0.00    |
| Hexadecanoic acid                                 | 6.83±2.21    | 5.31±2.46    | 2.77±0.69    | 1.29±0.20    | ND           | 3.15±0.51    |
| Octanoic acid                                     | 0.92±0.16    | 1.71±0.17    | 0.71±0.15    | 1.41±0.36    | 1.84±1.12    | ND           |
| Tetradecanoic acid                                | 3.75±1.53    | 5.16±1.67    | 2.24±0.79    | 2.42±0.85    | 4.42±3.36    | 3.33±1.01    |
| Subtotal                                          | 30.69±11.54  | 27.91±11.91  | 23.01±3.73   | 31.28±3.84   | 35.24±8.82   | 40.19±6.83   |
| Hydrocarbons (11)                                 |              |              |              |              |              |              |
| 2,4-Dimethyl-decane                               | ND           | 46.11±5.21   | ND           | ND           | 5.87±0.61    | 5.04±0.74    |
| 2,5,5-Trimethylheptane                            | ND           | 13.02±7.68   | 4.14±0.64    | 1.55±0.00    | ND           | 5.78±0.54    |
| 2,6,10-Trimethyltridecane                         | 6.03±2.19    | 0.83±0.10    | 3.37±0.29    | 3.61±0.17    | 1.6±0.00     | ND           |
| 3,5,5-Trimethyl-2-hexene                          | 2.65±0.00    | 1.80±0.00    | ND           | ND           | 3.04±0.13    | 3.02±0.20    |
| 3,7-Dimethyldecane                                | 0.73±0.00    | 7.70±4.55    | 1.51±0.00    | 2.04±1.66    | 8.78±0.56    | 1.44±0.61    |

|             |                |                |                |                |                |                |
|-------------|----------------|----------------|----------------|----------------|----------------|----------------|
| Decane      | 2.12±0.04      | 20.42±2.01     | 6.10±0.54      | ND             | 14.64±0.95     | 7.01±3.27      |
| Dodecane    | 2.61±1.45      | 14.01±8.04     | 4.98±0.28      | 8.62±9.66      | 8.12±0.99      | 6.33±3.64      |
| Tridecane   | 1.82±1.18      | 8.37±1.30      | 4.52±0.00      | 7.96±1.99      | 1.26±1.05      | 9.66±1.24      |
| Tetradecane | 1.50±0.86      | ND             | 0.32±0.00      | 1.00±0.00      | 1.24±0.40      | 0.93±0.00      |
| Pentadecane | 3.17±1.94      | 2.00±0.00      | ND             | 0.96±0.00      | 0.59±0.00      | 0.71±0.06      |
| Undecane    | 1.85±0.87      | 3.21±0.63      | 1.69±0.11      | 12.09±2.35     | ND             | 1.87±0.25      |
| Subtotal    | 22.48±8.53     | 117.47±29.52   | 26.63±1.86     | 37.83±15.83    | 45.14±4.69     | 41.79±10.55    |
| Total       | 2014.22±156.69 | 1246.83±174.65 | 2041.52±145.09 | 1072.91±132.46 | 1135.29±126.38 | 1117.19±115.45 |

ND = not determined.
